# Supplementary material for: Forcing factors of cloud-to-ground lightning over Iberia: regional-scale assessments
Source: Copernicus journal article supplement (doi:10.5194/nhess-13-1745-2013), 2013-07-05
Supplement: Supplementary file 1 [file nhess-13-1745-2013-supplement.pdf]

# **Forcing factors of cloud-to-ground lightning over Iberia: regional-scale assessments**

**João A. Santos<sup>1</sup>, Margarida A. Reis<sup>1</sup>, Fernando De Pablo<sup>2</sup>, Luís Rivas-Soriano<sup>2</sup>, Solange M. Leite<sup>1</sup>**

[1] Centre for the Research and Technology of Agro-environmental and Biological Sciences, University of Trás-os-Montes e Alto Douro, Vila Real, Portugal

[2] Departamento de Física General y de la Atmósfera, University of Salamanca, Spain

Correspondence to: J. A. Santos (jsantos@utad.pt)

**Supplementary Material**

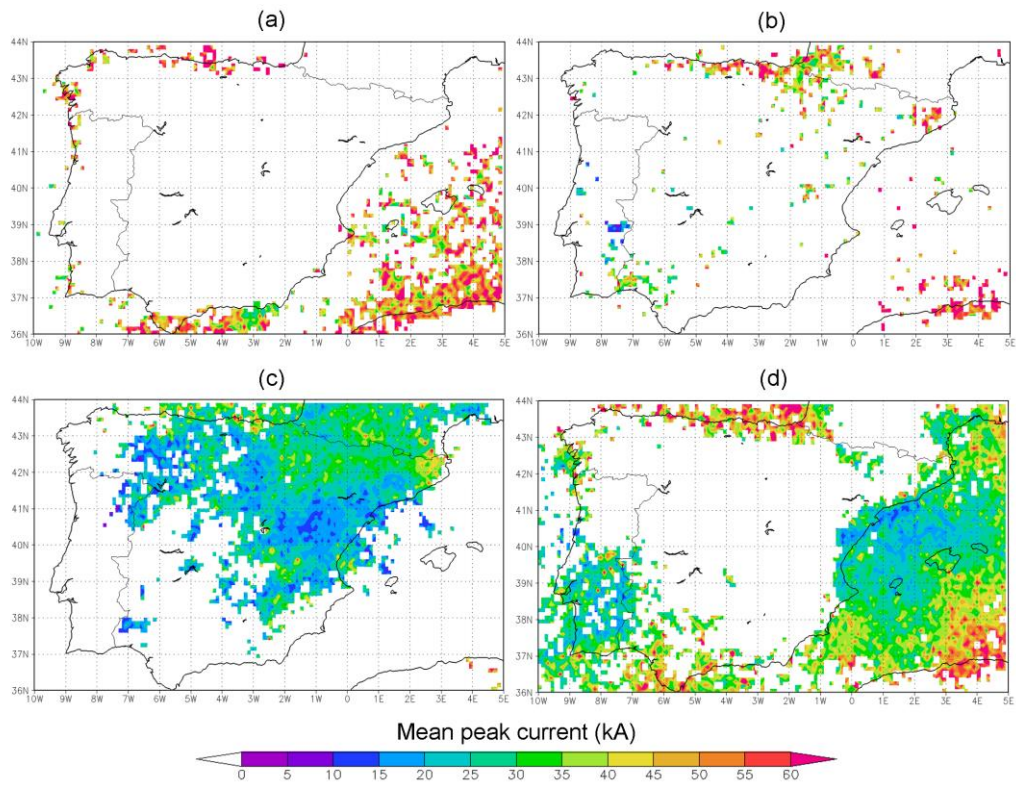

Figure S1: Maps of the 7-year (2003-2009) (a) DJF; (b) MAM; (c) JJA; (d) SON mean positive peak current (kA) recorded within the Iberian Sector [36-44°N, 10°W-5°E].

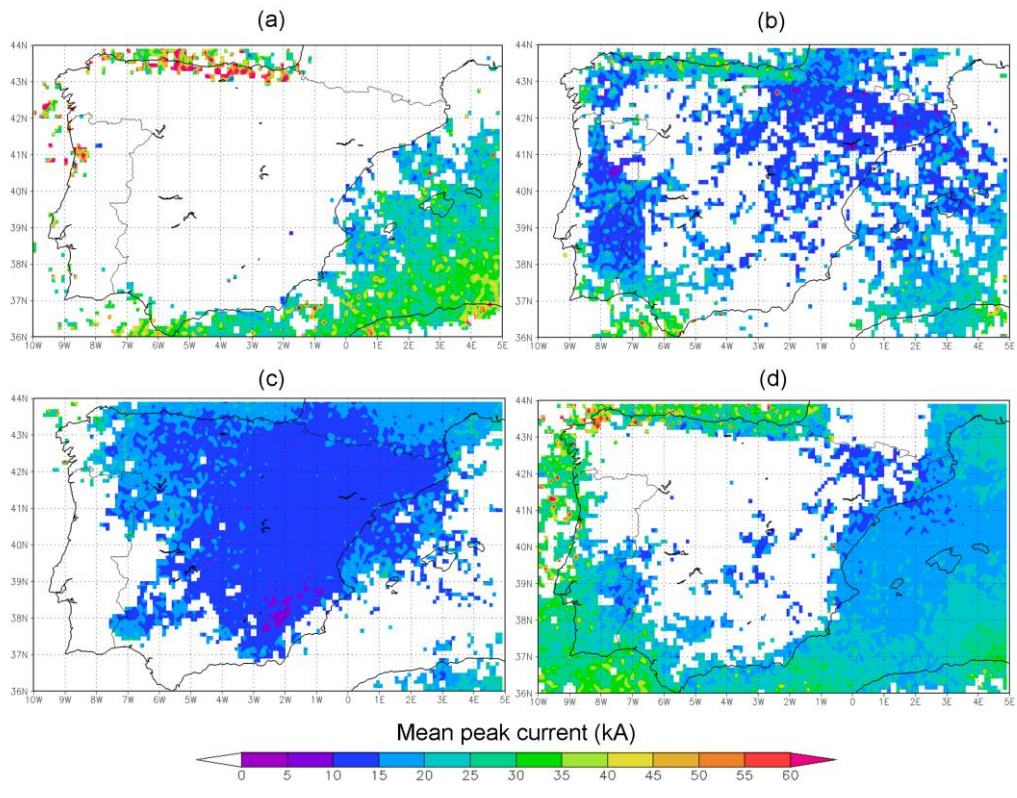

Figure S2: As in Fig. S1, but for the negative-polarity peak current.

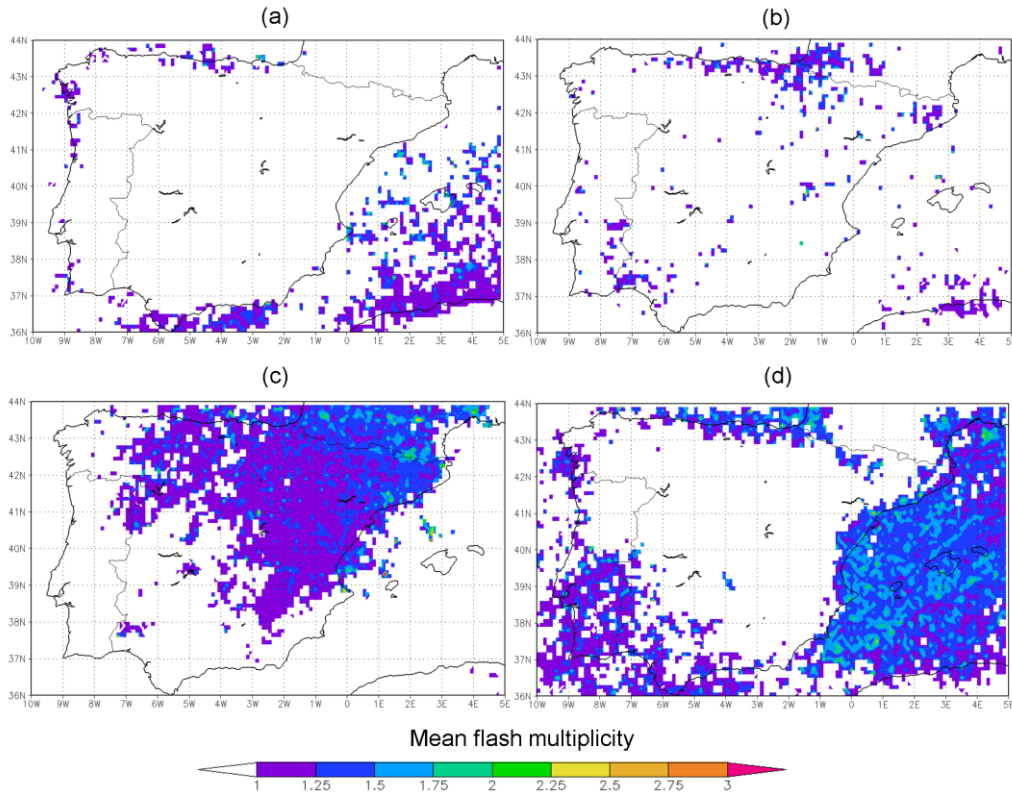

Figure S3: Maps of the 7-year (2003-2009) (a) DJF; (b) MAM; (c) JJA; (d) SON mean multiplicity of the positive-polarity CGF recorded within the Iberian Sector [36-44°N, 10°W-5°E].

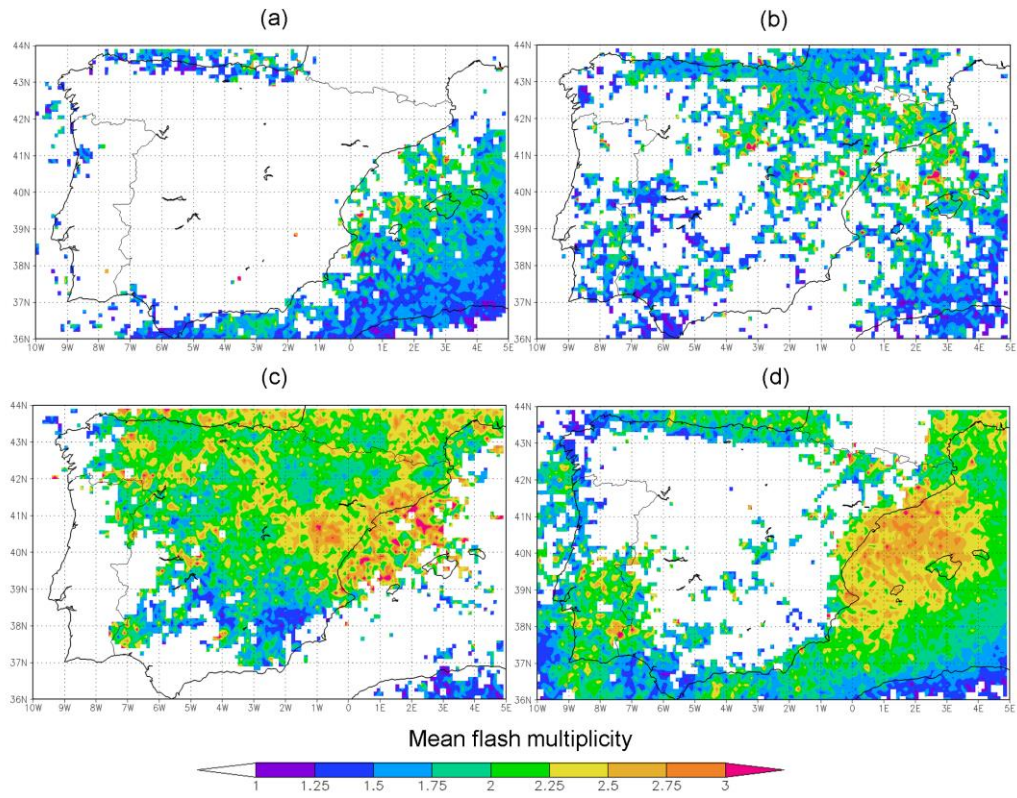

Figure S4: The same as in Fig. S3, but for the negative-polarity CGF.
